# Supplementary material for: Serum miR-373-3p and miR-194-5p Are Associated with Early Tumor Progression during FOLFIRINOX Treatment in Pancreatic Cancer Patients: A Prospective Multicenter Study
Source: MDPI journal article supplement (doi:10.3390/ijms222010902), 2021-10-09

**Table S1.** Differences in serum miRNA expression between stages of disease.

| miRNA                                | Resectable disease<br>( <i>n</i> =60)<br>Log2 FD | LAPC ( <i>n</i> =41)<br>Log2 FD | Metastatic disease<br>( <i>n</i> =19)<br>Log2 FD | <i>P</i> |
|--------------------------------------|--------------------------------------------------|---------------------------------|--------------------------------------------------|----------|
| <i>Before start of FOLFIRINOX</i>    |                                                  |                                 |                                                  |          |
| hsa-miR-17-3p                        | Ref                                              | -0.44                           | 0.14                                             | 0.030    |
| hsa-miR-373-3p                       | Ref                                              | -0.29                           | -0.08                                            | 0.607    |
| <i>After one cycle of FOLFIRINOX</i> |                                                  |                                 |                                                  |          |
| hsa-miR-18a-5p                       | Ref                                              | 0.33                            | 0.21                                             | 0.474    |
| hsa-miR-194-5p                       | Ref                                              | 0.32                            | 0.15                                             | 0.397    |
| hsa-miR-24-3p                        | Ref                                              | 0.43                            | -0.03                                            | 0.198    |
| hsa-miR-27a-3p                       | Ref                                              | 0.26                            | 0.20                                             | 0.883    |

FD = fold difference, LAPC = locally advanced pancreatic cancer, hsa = homo sapiens (human), miR/miRNA = microRNA. *P*-values by one-way ANOVA.

**Table S2.** Differences in serum miRNA expression between patients with disease control and patients with progressive disease after FOLFIRINOX for the three different stages of disease.

| miRNA                                | Resectable disease (n=60)<br>Log2 FD* | P     | LAPC (n=41)<br>Log2 FD* | P      | Metastatic disease (n=19)<br>Log2 FD* | P     |
|--------------------------------------|---------------------------------------|-------|-------------------------|--------|---------------------------------------|-------|
| <i>Before start of FOLFIRINOX</i>    |                                       |       |                         |        |                                       |       |
| hsa-miR-17-3p                        | 0.58                                  | 0.040 | 0.09                    | 0.829  | -0.60                                 | 0.459 |
| hsa-miR-373-3p                       | -2.16                                 | 0.566 | 1.56                    | <0.001 | 0.31                                  | 0.721 |
| <i>After one cycle of FOLFIRINOX</i> |                                       |       |                         |        |                                       |       |
| hsa-miR-18a-5p                       | -0.03                                 | 0.874 | 0.03                    | 0.880  | 0.04                                  | 0.900 |
| hsa-miR-194-5p                       | -0.42                                 | 0.173 | -0.36                   | 0.434  | -0.60                                 | 0.254 |
| hsa-miR-24-3p                        | -0.13                                 | 0.689 | -0.18                   | 0.651  | -0.40                                 | 0.401 |
| hsa-miR-27a-3p                       | -0.54                                 | 0.287 | -0.37                   | 0.534  | -0.79                                 | 0.354 |

FD = fold difference, LAPC = locally advanced pancreatic cancer, hsa = homo sapiens (human), miR/miRNA = microRNA. \*Fold differences are presented as the miRNA expression of progressive disease patients compared to disease control patients as reference group. *P*-values by t-tests.

**Figure S1.** In situ hybridization of liver, kidney, and pancreatic ductal adenocarcinoma (PDAC) liver metastasis tissue. Tissue sections are stained with U6 (positive control) or scramble miRNA probes (negative control), visualized with DAB. Scale bar = 100  $\mu$ m.

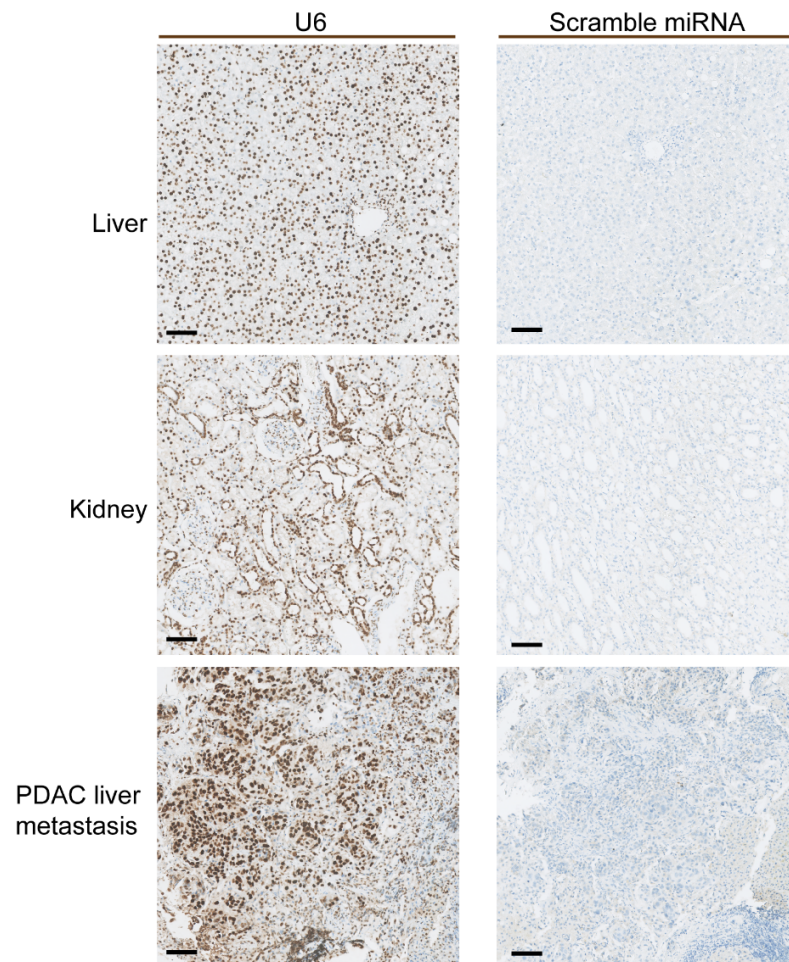



**Figure S2.** In situ hybridization of positive control tissues with miR-373-3p. Mir-373-3p expression is indicated in brown (DAB), cell nuclei are stained in blue with hematoxylin. MiR-373-3p is expressed by normal endothelium, hepatocytes, colon epithelium, renal tubular cells, neurons (brain), and in tonsillar B cell germinal centers. MiR-373-3p is also expressed in pancreatic acinar cells, but not in normal pancreatic ductal cells. Scale bar = 50  $\mu$ m.

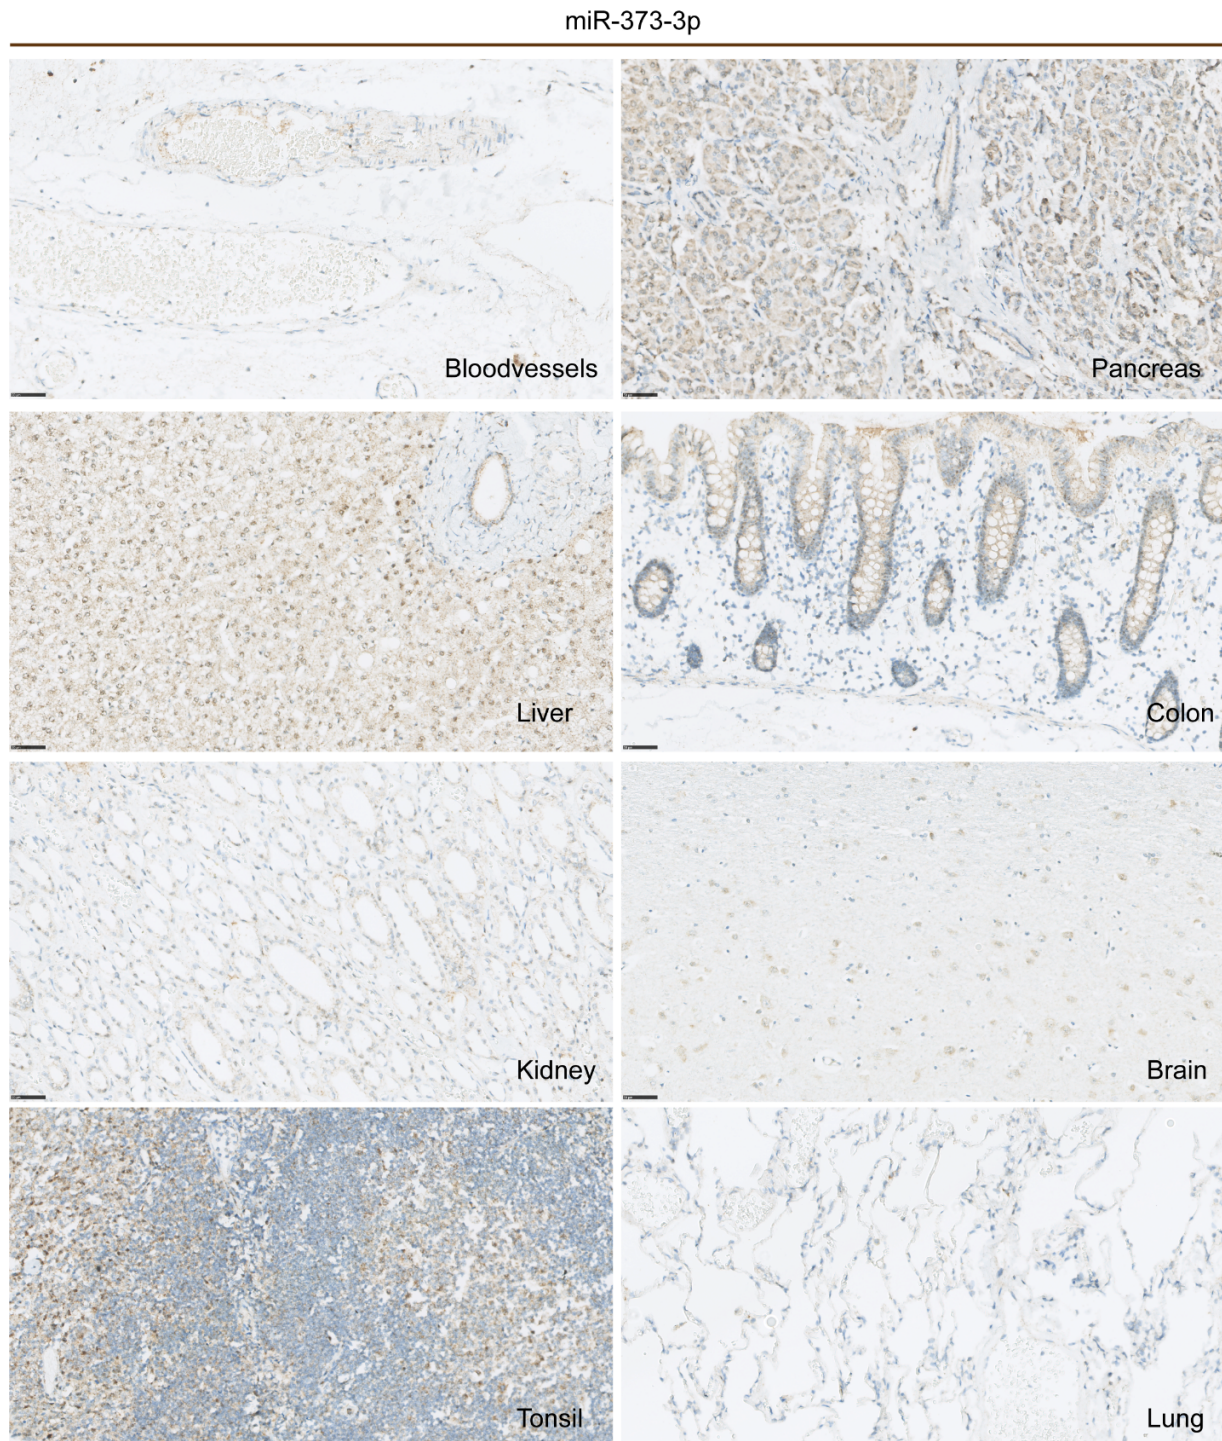

Supplement: s1 [file s1]
